# Supplementary material for: Challenges in treatment of posttraumatic stress disorder in refugees: towards integration of evidence-based treatments with contextual and culture-sensitive perspectives
Source: PubMed Central journal article supplement (PMC4287632; doi:10.3402/ejpt.v6.24750), 2015-01-07
Supplement: EJPT-6-24750-s004.pdf [file EJPT-6-24750-s004.pdf]

Boris Drozdek

#### Abstract

Zmiany w leczeniu zaburzenia po stresie traumatycznym wśród uchodźców: w kierunku integracji terapii opartych na danych naukowych z kontekstualno-kulturowym podejściem terapeutycznym

Wprowadzenie: Badania wskazują, że terapia skoncentrowana na traumie oraz interwencje multimodalne są dwoma najczęściej stosowanymi metodami leczenia zaburzenia po stresie traumatycznym wśród uchodźców. Jeśli badania empiryczne dostarczą danych na pewien stopień skuteczności terapii skoncentrowanej na traumie w leczeniu PTSD wśród tej grupy osób, to jednak tego samego nie można powiedzieć o interwencjach multimodalnych. Być może jednak jest to spowodowane tym, że interwencje multimodalne były stosowane wśród pacjentów z wyższym nasileniem objawów psychopatologicznych. Być może koniecznym jest uzupełnienie dotychczasowych metod leczenia o podejście kontekstualno-kulturowe.

Cel: Celem niniejszej pracy było zwrócenie uwagi klinicystów na przydatność Zintegrowanego Modelu Kontekstualnego (ang. the Integrative Contextual Model) przy zrozumieniu i pomiarze objawów PTSD wśród uchodźców. Niniejsze prace dąży też do wzbogacenia obecnie istniejących metod leczenia PTSD.

Metoda: Bazując na literaturze przedmiotu, doświadczeniu klinicznym oraz prezentacji fikcyjnych studiów przypadku, dyskutowana jest przydatność Zintegrowanego Modelu Kontekstualnego w leczeniu PTSD wśród uchodźców.

Wyniki: Zintegrowany Model Kontekstualny może być wykorzystany w zrozumieniu w powstawaniu i utrzymywaniu się PTSD wśród uchodźców. Model ten może być połączony z terapiami PTSD opartymi na danych naukowych.

Konkluzje: Problematyka zdrowia psychicznego wśród uchodźców nie jest do końca zbadana.

Użycie Zintegrowanego Modelu Kontekstualnego może znacznie rozjaśnić tę tematykę.

Słowa kluczowe: uchodźcy; PTSD; interwencja; terapia; kontekst; wywiady kulturowe; zorganizowana przemoc; kultura.

Name of translator: Marcin Rzeszutek, University of Finance and Management in Warsaw, Poland

Citation: European Journal of Psychotraumatology 2015, 6: 24750 - <http://dx.doi.org/10.3402/ejpt.v6.24750>
